# Supplementary material for: Truncating TINF2 p.Tyr312Ter variant and inherited breast cancer susceptibility
Source: Springer Nature journal article supplement (doi:10.1007/s10689-022-00295-z), 2022-05-20
Supplement: MOESM1 [file 22165648]

## Truncating *TINF2* p.Tyr312Ter variant and inherited breast cancer susceptibility

### Supplementary data

Susanna Koivuluoma, MSc<sup>1</sup>, Sandra Vorimo, BSc<sup>1</sup>, Tiina M. Mattila, PhD<sup>1</sup>, Anna Tervasmäki, PhD<sup>1</sup>,  
Timo Kumpula, MSc<sup>1</sup>, Outi Kuismin, MD, PhD<sup>2</sup>, Robert Winqvist, PhD<sup>1</sup>, Jukka Moilanen, MD, PhD<sup>2</sup>,  
Tuomo Mantere, PhD<sup>1</sup>, Katri Pylkäs, PhD<sup>1</sup>, \*

<sup>1</sup>Laboratory of Cancer Genetics and Tumor Biology, Cancer and Translational Medicine Research Unit and Biocenter Oulu, NordLab Oulu, University of Oulu, Oulu, Finland

<sup>2</sup>Department of Clinical Genetics, Oulu University Hospital, Medical Research Center Oulu and PEDEGO Research Unit, University of Oulu, Oulu, Finland

**Table S1** cDNA-specific PCR primers used for the amplification of short and long *TINF2* isoforms

|                       | Short isoform         | Long isoform          |
|-----------------------|-----------------------|-----------------------|
| <b>Forward primer</b> | GACAATATGGTGTGGACATGG | GACAATATGGTGTGGACATGG |
| <b>Reverse primer</b> | GCAAGCAAAGAGGATAGGATG | GCCAGAAGGGGGTAGGTATT  |

**Table S2** Results from exome data analysis filtered for rare (MAF< 0.01) missense and protein truncating variants (PTV) in shelterin complex genes

|                | Genomic location (Hg19) <sup>a</sup> | PTV                      | Missense                |
|----------------|--------------------------------------|--------------------------|-------------------------|
| <i>TINF2</i>   | chr14:24,708,846-24,711,880          | p.Tyr312Ter <sup>b</sup> | None                    |
| <i>TERF1</i>   | chr8:73,921,099-73,960,358           | None                     | p.Ala21Gly <sup>c</sup> |
| <i>TERF2</i>   | chr16:69,389,470-69,419,910          | None                     | None                    |
| <i>TERF2IP</i> | chr16:75,681,671-75,691,330          | None                     | None                    |
| <i>ACD</i>     | chr16:67,691,415-67,694,163          | None                     | None                    |
| <i>POT1</i>    | chr7:124,462,440-124,569,879         | None                     | None                    |

<sup>a</sup> Genomic coordinates from RefSeq<sup>b</sup> *TINF2* p.Tyr312Ter (c.936C>A, rs201677741)<sup>c</sup> *TERF1* p.Ala21Gly (c.62C>G, rs370999354)**Table S3** Family history of cancer in *TINF2* c.936C>A (p.Tyr312Ter) positive index cases

| Index ID -<br>Cancers/tumors<br>(age at<br>diagnosis) | Breast/ovarian<br>cancer(s) in 1 <sup>st</sup><br>and/or 2 <sup>nd</sup><br>degree relatives<br>(age at diagnosis) | Breast/ovarian<br>cancer(s) in 3 <sup>rd</sup><br>degree relatives<br>(age at diagnosis) | Other cancers in<br>1 <sup>st</sup> and/or 2 <sup>nd</sup><br>degree relatives<br>(age at diagnosis) | Other cancers<br>in 3 <sup>rd</sup> degree<br>relatives (age<br>at diagnosis) |
|-------------------------------------------------------|--------------------------------------------------------------------------------------------------------------------|------------------------------------------------------------------------------------------|------------------------------------------------------------------------------------------------------|-------------------------------------------------------------------------------|
| <b>Her1 -Br (27)</b>                                  | -                                                                                                                  | Br (u), Br + Ov (40)                                                                     | -                                                                                                    | Sto (u)                                                                       |
| <b>Uns1 -Br (51)</b>                                  | -                                                                                                                  | -                                                                                        | Lu (u), Csu (u),<br>Csu (u)                                                                          | -                                                                             |
| <b>Uns2 -Br (64)</b>                                  | Br (u), Ov (u)                                                                                                     | -                                                                                        | Lu (56), Pro (65)                                                                                    | -                                                                             |
| <b>Uns3 -Br (66)</b>                                  | Br (u)                                                                                                             | -                                                                                        | Pro (u), Es (60),<br>Csu (u), Pro (u)                                                                | -                                                                             |
| <b>Uns4 -Br (64)</b>                                  | -                                                                                                                  | -                                                                                        | Mel <sup>a</sup> (u)                                                                                 | -                                                                             |

Br=Breast cancer, Csu=Cancer site unknown, Es=Esophagus, Her=hereditary cohort, Lu=Lung cancer, Mel=Melanoma, Ov=Ovarian cancer, Pro=Prostatic cancer, Sto=Stomach cancer, u=Unknown, Uns=unselected cohort.

<sup>a</sup> Sister of the index

**Table S4** Tumor characteristics of *TINF2* c.936C>A p.Tyr312Ter carriers

| Index ID | Morphology | Receptor status<br>(ER, PR, HER2) | TNM    |
|----------|------------|-----------------------------------|--------|
| Her1     | Ductal     | ER-, PR-, HER2+                   | T2N1M1 |
| Uns1     | Ductal     | ER+, PR+, HER2-                   | T2N1M0 |
| Uns2     | Ductal     | ER+, PR+, HER2-                   | T1N0M0 |
| Uns3     | Lobular    | ER+, PR+, HER2-                   | T1N0M0 |
| Uns4     | Ductal     | ER+, PR+, HER2-                   | T1N0M0 |

Her=Hereditary cohort, Uns=Unselected cohort, T=Tumor size, N=Nodal status, M=Primary metastasis, ER=Estrogen receptor, PR=Progesterone receptor.

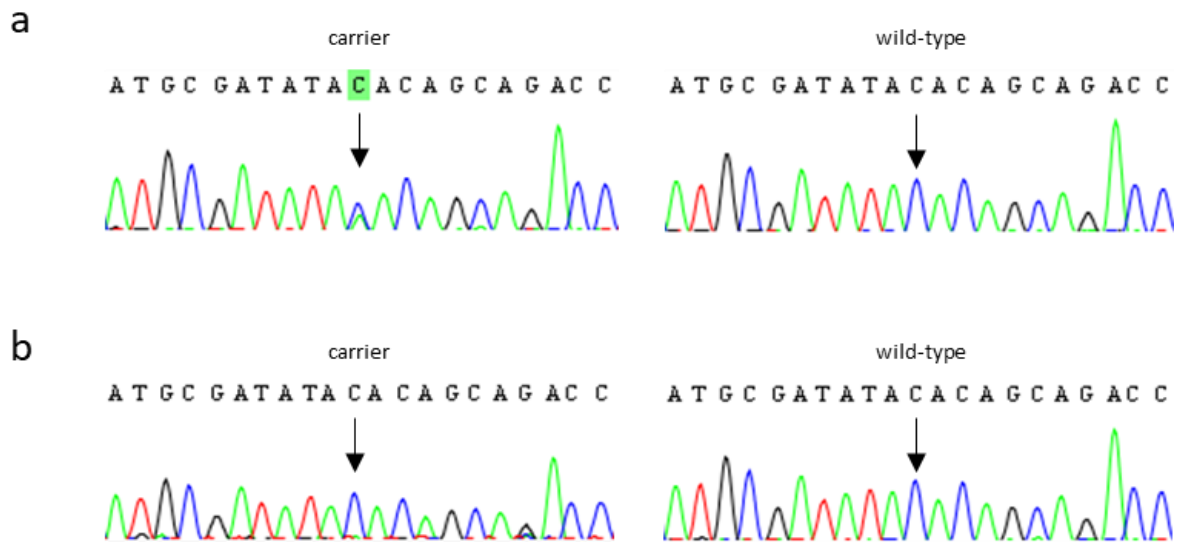

**Fig. S1** Sequence chromatograms of *TINF2* c.936C>A (p.Tyr312Ter) variant carrier and wild-type in (a) the short isoform of *TINF2* cDNA and (b) the long isoform cDNA. Mutation site c.936C>A is pointed by black arrows.
